# Supplementary material for: Exposure to the BPA-Substitute Bisphenol S Causes Unique Alterations of Germline Function
Source: PubMed Central journal article supplement (PMC4966967; doi:10.1371/journal.pgen.1006223), 2016-07-29
Supplement: pgen.1006223.s001.pdf [file pgen.1006223.s001.pdf]

**Table S1:**

Bisphenols internal exposure level detected by gas chromatography-mass spectrometry

| Bisphenol media<br>concentration<br>( $\mu\text{M}$ ) | Endogenous Bisphenol concentration<br>(Mean $\pm$ SD, $\mu\text{g/g}$ worm tissue) |                     |
|-------------------------------------------------------|------------------------------------------------------------------------------------|---------------------|
|                                                       | BPA                                                                                | BPS                 |
| 500                                                   | 1.89 $\pm$ 0.32                                                                    | 0.39 $\pm$ 0.01     |
| 250                                                   | 0.68 $\pm$ 0.17                                                                    | 0.21 $\pm$ 0.01     |
| 125                                                   | 0.23 $\pm$ 0.02                                                                    | <0.100 <sup>a</sup> |

<sup>a</sup>Under the limit of detection of BPS. N=3 for each group
