# Supplementary material for: Exposure to the BPA-Substitute Bisphenol S Causes Unique Alterations of Germline Function
Source: PubMed Central journal article supplement (PMC4966967; doi:10.1371/journal.pgen.1006223), 2016-07-29
Supplement: pgen.1006223.s002.pdf [file pgen.1006223.s002.pdf]

**Table S2:** Primer pairs used for quantitative RT-PCR analysis

|    | Primer pair     | Left Primer sequence   | Right primer sequence   |
|----|-----------------|------------------------|-------------------------|
| 1  | <i>atl-1</i>    | gcattctcctgcgttttctc   | cgtcgaaccttcgtcttctc    |
| 2  | <i>atm-1</i>    | cccgattctgattgaaggaa   | ggcttctcggaaatttgc      |
| 3  | <i>brc-1</i>    | caacaatgCGGaggagaaat   | taccattccattgtcacca     |
| 4  | <i>chk-1</i>    | gtctggctcgtctgggattgt  | ttgctgatccatcccattga    |
| 5  | <i>rad-50</i>   | gaaatgcaaaccacgagat    | tccattggcttttcgttctt    |
| 6  | <i>rad-51</i>   | ccaggctgatgctaaaagc    | ttcggcttctggtaaattgg    |
| 7  | <i>rad-54</i>   | cgcttcgaatgtggatcg     | gtcgttttctcggcttcag     |
| 8  | <i>cep-1</i>    | ttccgacgcaagtagtctcc   | ccgtttgcattgaacaacac    |
| 9  | <i>hus-1</i>    | aagatactgCGGcaatcgac   | tgaaccaactccaccatca     |
| 10 | <i>mre-11</i>   | ctgtttggaaagcacagcaa   | ttgaatgctcgaacaagacg    |
| 11 | <i>mrt-2</i>    | tagaaacgggtcaatgcaca   | gtgccacgttctgtatcct     |
| 12 | <i>msh-5</i>    | ccccaaaacagctttccata   | ggcgttctgaatggatcact    |
| 13 | <i>gpd-1</i>    | actcgtccattttcgaatgct  | tcgacaacacggttcagtag    |
| 14 | C04G2.9         | cgccaccgaaagaagatact   | ctgcttgggtggtcagttcag   |
| 15 | C40H1.8         | tcaactgccaacaatgaagc   | cctgtccatgagctccctta    |
| 16 | <i>col-133</i>  | atgctgtcttcaggagctg    | catctcctgtggtcctggt     |
| 17 | <i>gpx-3</i>    | ctgcaacgggtgatgaaaca   | ttgcaacattgacgagaagaa   |
| 18 | <i>ugt-18</i>   | aagaaagattttgtggctcaaa | catttcaggatccattctcca   |
| 19 | <i>ugt-36</i>   | gtttgttcttcgcccgtgtg   | cacattatgccctgcgatg     |
| 20 | Y65B4BR.1       | gagcaaaaataccccgacttc  | atgctcgtcgagagagtgg     |
| 21 | <i>ttr-44</i>   | tcagtcgattgctgtcaagg   | ctccggacaattggaactct    |
| 22 | Y111B2A.1       | ttccacgtgtaccttcacca   | tttcaaactcctcctggttc    |
| 23 | <i>pqn-98</i>   | gaagtgcagttggcatcaga   | gctggagctggtgatccttc    |
| 24 | <i>dsbn-1</i>   | cgtttctgcaaccaaactga   | agctgctgatttggcttgtt    |
| 25 | K08E4.2         | atcgacaatcgctcgttctt   | cgtccgtctcgattgaaat     |
| 26 | <i>sgca-1</i>   | gaaacattgggcgaattcat   | cgcagtgaggattcgtgtct    |
| 27 | W08E12.8        | cgctttccatcaaccaactt   | gggaaatgCGGagagtgtgt    |
| 28 | C48B4.8         | cgctttgcaatgggataca    | tcgtagtagaaagtcggaatgaa |
| 29 | <i>inx-17</i>   | ctgggctccgaaacaattta   | tttgtttcccggatagctg     |
| 30 | F58F9.3         | cccatcacaatctgtcagctc  | tgctctgccaatgaaactgt    |
| 31 | <i>clec-169</i> | ttcggaaagattttggattgg  | ccgcataactgcacacaaac    |
